# Supplementary material for: Macrophage Paired Immunoglobulin-Like Receptor B Deficiency Promotes Peripheral Atherosclerosis in Apolipoprotein E–Deficient Mice
Source: Front Cell Dev Biol. 2022 Mar 7;9:783954. doi: 10.3389/fcell.2021.783954 (PMC8936951; doi:10.3389/fcell.2021.783954)
Supplement: Supplementary file 2 [file DataSheet3.XLS]

## Sheet: ClueGO Results
ID	GO/KEGG term	Ontology source	Term p-value	Adj term p-value with Bonferroni step down	Group p-value	Adj group p-value with Bonferroni step down	GO Levels	GO Groups	% associated genes	No. of genes	Associated genes found
GO:0042101	T cell receptor complex	GO_CellularComponent-EBI-UniProt-GOA_27.02.2019_00h00	3.23905e-09	2.3645e-07	3.23905e-09	2.59124e-08	[4, 5, 6, 7, 8]	Group04	40	10	[APBB1IP, CD247, CD3G, CD6, CD8A, CD8B, PTPN6, SKAP1, SYK, TRAT1]
GO:0042613	MHC class II protein complex	GO_CellularComponent-EBI-UniProt-GOA_27.02.2019_00h00	1.0117e-06	5.56437e-05	2.56709e-20	4.10735e-19	[5, 6, 7, 8]	Group15	38.8889	7	[HLA-DMB, HLA-DOA, HLA-DPB1, HLA-DQB2, HLA-DRB1, HLA-DRB3, HLA-DRB4]
GO:0045780	positive regulation of bone resorption	GO_BiologicalProcess-EBI-UniProt-GOA_27.02.2019_00h00	6.61186e-07	3.83488e-05	4.69762e-07	9.39523e-07	[4, 5, 6, 7, 8]	Group11	33.3333	8	[ADAM8, CA2, DCSTAMP, IBSP, OSCAR, SPP1, SYK, TNFRSF11A]
KEGG:05330	Allograft rejection	KEGG_27.02.2019	2.04636e-09	1.53477e-07	2.56709e-20	4.10735e-19	[-1]	Group15	31.5789	12	[CD28, CD40LG, CD80, FASLG, GZMB, HLA-DMB, HLA-DOA, HLA-DPB1, HLA-DRB1, HLA-DRB3, HLA-DRB4, TNF]
GO:0090197	positive regulation of chemokine secretion	GO_BiologicalProcess-EBI-UniProt-GOA_27.02.2019_00h00	2.61334e-07	1.67254e-05	1.17911e-06	1.17911e-06	[5, 6, 7, 8, 9, 10, 11, 12]	Group12	31.0345	9	[AIF1, CD5, CSF1R, LCP1, LPL, PMAIP1, PYCARD, RUNX2, TNF]
GO:1903978	regulation of microglial cell activation	GO_BiologicalProcess-EBI-UniProt-GOA_27.02.2019_00h00	2.61334e-07	1.67254e-05	7.04131e-12	8.44957e-11	[5, 6, 7, 8]	Group13	31.0345	9	[C1QA, CST7, CTSC, GRN, ITGAM, ITGB2, PTPRC, TNF, TREM2]
KEGG:04940	Type I diabetes mellitus	KEGG_27.02.2019	7.96431e-10	6.13252e-08	2.56709e-20	4.10735e-19	[-1]	Group15	30.2326	13	[CD28, CD80, FASLG, GAD1, GZMB, HLA-DMB, HLA-DOA, HLA-DPB1, HLA-DRB1, HLA-DRB3, HLA-DRB4, IL1B, TNF]
GO:0071677	positive regulation of mononuclear cell migration	GO_BiologicalProcess-EBI-UniProt-GOA_27.02.2019_00h00	3.62361e-07	2.24664e-05	3.62361e-07	1.08708e-06	[4, 5, 6, 7, 8, 9]	Group08	30	9	[AIF1, CCL5, CCR1, CXCL10, FPR2, FPR3, PDGFD, PLA2G7, TNF]
KEGG:05340	Primary immunodeficiency	KEGG_27.02.2019	1.98288e-08	1.40785e-06	1.98288e-08	1.38802e-07	[-1]	Group03	29.7297	11	[ADA, BLNK, BTK, CD40LG, CD8A, CD8B, CIITA, IL2RG, IL7R, LCK, PTPRC]
GO:0001774	microglial cell activation	GO_BiologicalProcess-EBI-UniProt-GOA_27.02.2019_00h00	6.09774e-11	4.81722e-09	7.04131e-12	8.44957e-11	[4, 5, 6, 7]	Group13	29.4118	15	[AIF1, C1QA, CST7, CTSC, FPR2, FPR3, GRN, ITGAM, ITGB2, PTPRC, SNCA, TLR7, TNF, TREM2, TYROBP]
KEGG:05332	Graft-versus-host disease	KEGG_27.02.2019	5.44759e-09	3.92226e-07	2.56709e-20	4.10735e-19	[-1]	Group15	29.2683	12	[CD28, CD80, FASLG, GZMB, HLA-DMB, HLA-DOA, HLA-DPB1, HLA-DRB1, HLA-DRB3, HLA-DRB4, IL1B, TNF]
KEGG:05310	Asthma	KEGG_27.02.2019	4.95595e-07	2.92401e-05	2.56709e-20	4.10735e-19	[-1]	Group15	29.0323	9	[CD40LG, HLA-DMB, HLA-DOA, HLA-DPB1, HLA-DRB1, HLA-DRB3, HLA-DRB4, MS4A2, TNF]
GO:0090196	regulation of chemokine secretion	GO_BiologicalProcess-EBI-UniProt-GOA_27.02.2019_00h00	6.69268e-07	3.81483e-05	1.17911e-06	1.17911e-06	[5, 6, 7, 8, 9, 10, 11]	Group12	28.125	9	[AIF1, CD5, CSF1R, LCP1, LPL, PMAIP1, PYCARD, RUNX2, TNF]
GO:0043304	regulation of mast cell degranulation	GO_BiologicalProcess-EBI-UniProt-GOA_27.02.2019_00h00	6.69268e-07	3.81483e-05	8.24276e-11	8.24276e-10	[5, 6, 7, 8, 9, 10]	Group14	28.125	9	[ADGRE2, CD300A, CD84, FGR, HMOX1, LYN, RAC2, SYK, VAMP8]
KEGG:04640	Hematopoietic cell lineage	KEGG_27.02.2019	6.15216e-18	5.22934e-16	6.15216e-18	9.22825e-17	[-1]	Group10	27.8351	27	[ANPEP, CD14, CD2, CD33, CD36, CD37, CD3G, CD5, CD8A, CD8B, CR1, CSF1R, CSF3, CSF3R, HLA-DMB, HLA-DOA, HLA-DPB1, HLA-DRB1, HLA-DRB3, HLA-DRB4, IL1B, IL7R, ITGAM, KIT, MME, MS4A1, TNF]
GO:0033006	regulation of mast cell activation involved in immune response	GO_BiologicalProcess-EBI-UniProt-GOA_27.02.2019_00h00	8.93218e-07	5.00202e-05	8.24276e-11	8.24276e-10	[4, 5, 6, 7]	Group14	27.2727	9	[ADGRE2, CD300A, CD84, FGR, HMOX1, LYN, RAC2, SYK, VAMP8]
GO:0090195	chemokine secretion	GO_BiologicalProcess-EBI-UniProt-GOA_27.02.2019_00h00	1.17911e-06	6.24929e-05	1.17911e-06	1.17911e-06	[4, 5, 7, 8, 9, 10]	Group12	26.4706	9	[AIF1, CD5, CSF1R, LCP1, LPL, PMAIP1, PYCARD, RUNX2, TNF]
KEGG:05150	Staphylococcus aureus infection	KEGG_27.02.2019	5.36888e-12	4.34879e-10	2.56709e-20	4.10735e-19	[-1]	Group15	26.4706	18	[C1QA, C1QB, C1QC, C2, C3, FPR2, FPR3, HLA-DMB, HLA-DOA, HLA-DPB1, HLA-DRB1, HLA-DRB3, HLA-DRB4, ITGAL, ITGAM, ITGB2, PTAFR, SELPLG]
GO:0043303	mast cell degranulation	GO_BiologicalProcess-EBI-UniProt-GOA_27.02.2019_00h00	3.50456e-10	2.73356e-08	8.24276e-11	8.24276e-10	[4, 5, 6, 7, 8, 9]	Group14	26.3158	15	[ADGRE2, BTK, CD300A, CD84, FGR, HMOX1, KIT, LAT2, LYN, MILR1, PIK3CG, RAC2, RASGRP1, SYK, VAMP8]
GO:0150077	regulation of neuroinflammatory response	GO_BiologicalProcess-EBI-UniProt-GOA_27.02.2019_00h00	3.88131e-08	2.71692e-06	7.04131e-12	8.44957e-11	[5, 6, 7]	Group13	25	12	[C1QA, CST7, CTSC, GRN, IGFBP1, IL1B, ITGAM, ITGB2, MMP9, PTPRC, TNF, TREM2]
KEGG:04672	Intestinal immune network for IgA production	KEGG_27.02.2019	4.98583e-08	3.44022e-06	2.56709e-20	4.10735e-19	[-1]	Group15	24.4898	12	[CD28, CD40LG, CD80, HLA-DMB, HLA-DOA, HLA-DPB1, HLA-DRB1, HLA-DRB3, HLA-DRB4, ITGB7, TNFRSF17, TNFSF13B]
GO:0050766	positive regulation of phagocytosis	GO_BiologicalProcess-EBI-UniProt-GOA_27.02.2019_00h00	4.88774e-12	4.00795e-10	4.88774e-12	6.35406e-11	[3, 4, 5, 6, 7]	Group06	23.2558	20	[ABCA7, C2, C3, CD300LF, CD36, CYBA, DOCK2, IL1B, IL2RB, IL2RG, NCKAP1L, PMAIP1, PPARG, PTPRC, PTPRJ, PYCARD, SIRPA, SIRPG, SLC11A1, TNF]
KEGG:05323	Rheumatoid arthritis	KEGG_27.02.2019	1.67962e-12	1.39408e-10	2.56709e-20	4.10735e-19	[-1]	Group15	23.0769	21	[ACP5, ATP6V0D2, CCL5, CD28, CD80, CXCL1, CXCL5, HLA-DMB, HLA-DOA, HLA-DPB1, HLA-DRB1, HLA-DRB3, HLA-DRB4, IL1B, ITGAL, ITGB2, LTB, MMP1, TNF, TNFRSF11A, TNFSF13B]
GO:0043300	regulation of leukocyte degranulation	GO_BiologicalProcess-EBI-UniProt-GOA_27.02.2019_00h00	1.27628e-07	8.55109e-06	8.24276e-11	8.24276e-10	[4, 5, 6, 7, 8, 9]	Group14	22.6415	12	[ADGRE2, CD300A, CD84, FGR, HMOX1, ITGAM, ITGB2, LYN, PTAFR, RAC2, SYK, VAMP8]
GO:0045124	regulation of bone resorption	GO_BiologicalProcess-EBI-UniProt-GOA_27.02.2019_00h00	4.69762e-07	2.81857e-05	4.69762e-07	9.39523e-07	[3, 5, 6, 7]	Group11	22.449	11	[ADAM8, CA2, CSF1R, DCSTAMP, IBSP, INPP5D, OSCAR, P2RX7, SPP1, SYK, TNFRSF11A]
KEGG:05134	Legionellosis	KEGG_27.02.2019	1.97488e-07	1.28367e-05	1.97488e-07	9.87439e-07	[-1]	Group02	21.8182	12	[C3, CASP1, CD14, CR1, CXCL1, CXCL3, IL1B, ITGAM, ITGB2, NLRC4, PYCARD, TNF]
KEGG:05140	Leishmaniasis	KEGG_27.02.2019	2.11214e-09	1.56299e-07	2.56709e-20	4.10735e-19	[-1]	Group15	21.6216	16	[C3, CR1, CYBA, CYBB, HLA-DMB, HLA-DOA, HLA-DPB1, HLA-DRB1, HLA-DRB3, HLA-DRB4, IL1B, ITGAM, ITGB2, NCF2, PTPN6, TNF]
GO:0042102	positive regulation of T cell proliferation	GO_BiologicalProcess-EBI-UniProt-GOA_27.02.2019_00h00	2.15999e-15	1.81439e-13	2.15999e-15	3.02399e-14	[6, 7, 8, 9]	Group05	21.5385	28	[ACP5, AIF1, CAPG, CCDC88B, CCL5, CD209, CD28, CD40LG, CD6, CD80, CORO1A, HAVCR2, HLA-DMB, HLA-DPB1, HLA-DRB3, IGFBP1, IL1B, LILRB2, NCKAP1L, PRKCQ, PTPN22, PTPRC, PYCARD, RASAL3, S1PR4, SASH3, SYK, TNFSF13B]
GO:0070821	tertiary granule membrane	GO_CellularComponent-EBI-UniProt-GOA_27.02.2019_00h00	2.28459e-11	1.82767e-09	2.28459e-11	2.51305e-10	[4, 5, 6, 7, 8, 9, 10, 11]	Group07	21.5054	20	[ADAM8, CD300A, CD33, CD53, CYBA, CYBB, FPR2, FPR3, ITGAM, ITGAX, ITGB2, LAIR1, LILRA3, LILRB2, MCEMP1, PTAFR, SIRPA, SLC11A1, SNAP25, VAMP8]
GO:0045058	T cell selection	GO_BiologicalProcess-EBI-UniProt-GOA_27.02.2019_00h00	8.23734e-08	5.60139e-06	8.23734e-08	4.9424e-07	[2, 6, 7, 8, 9, 10, 11]	Group01	21.3115	13	[ASPM, BCL11B, C3, CCR7, CD28, CD3G, DOCK2, GATA3, IRF4, PTPRC, SYK, TBX21, THEMIS]
GO:0030888	regulation of B cell proliferation	GO_BiologicalProcess-EBI-UniProt-GOA_27.02.2019_00h00	8.83284e-10	6.71296e-08	8.83284e-10	7.94955e-09	[6, 7, 8]	Group09	21.25	17	[ADA, ADCYAP1, BTK, CD300A, CLC, FCRL3, INPP5D, LYN, MNDA, NCKAP1L, PTPRC, S100A9, SASH3, TNFRSF21, TNFSF13B, TYROBP, VAV3]
GO:0002673	regulation of acute inflammatory response	GO_BiologicalProcess-EBI-UniProt-GOA_27.02.2019_00h00	2.99573e-07	1.88731e-05	2.99573e-07	1.19829e-06	[5, 6, 7]	Group00	21.0526	12	[ADAM8, ADCYAP1, BTK, C3, CCR7, DNASE1L3, IL1B, PIK3CG, PPARG, PTGER3, TNF, TNFRSF11A]
KEGG:05320	Autoimmune thyroid disease	KEGG_27.02.2019	1.08893e-06	5.88021e-05	2.56709e-20	4.10735e-19	[-1]	Group15	20.7547	11	[CD28, CD40LG, CD80, FASLG, GZMB, HLA-DMB, HLA-DOA, HLA-DPB1, HLA-DRB1, HLA-DRB3, HLA-DRB4]
KEGG:05416	Viral myocarditis	KEGG_27.02.2019	4.4617e-07	2.72164e-05	2.56709e-20	4.10735e-19	[-1]	Group15	20.339	12	[CD28, CD40LG, CD80, HLA-DMB, HLA-DOA, HLA-DPB1, HLA-DRB1, HLA-DRB3, HLA-DRB4, ITGAL, ITGB2, RAC2]
KEGG:05321	Inflammatory bowel disease (IBD)	KEGG_27.02.2019	1.82281e-07	1.20306e-05	2.56709e-20	4.10735e-19	[-1]	Group15	20	13	[GATA3, HLA-DMB, HLA-DOA, HLA-DPB1, HLA-DRB1, HLA-DRB3, HLA-DRB4, IL18RAP, IL1B, IL21R, IL2RG, TBX21, TNF]
